# Supplementary material for: Androgen Deprivation Therapy and Newly Developed Neovascular Age-Related Macular Degeneration Risk in Patients with Prostate Cancer
Source: MDPI journal article supplement (doi:10.3390/jcm13102978), 2024-05-18
Supplement: s1 [file s1]

**Supplementary Table S1.** ICD-10 and billing codes for identification of diagnoses and medications

| Comorbidity               | ICD-10 code                                                                                                                                                                                                                                                                                                                                                                                                                                                                                                                                                      |
|---------------------------|------------------------------------------------------------------------------------------------------------------------------------------------------------------------------------------------------------------------------------------------------------------------------------------------------------------------------------------------------------------------------------------------------------------------------------------------------------------------------------------------------------------------------------------------------------------|
| Cataract                  | H25 (Senile cataract): H25.0, H25.1, H25.2, H25.8, H25.9<br>H26 (Other cataract): H26.0, H26.1, H26.2, H26.3, H26.4, H26.8, H26.9                                                                                                                                                                                                                                                                                                                                                                                                                                |
| Hypertension              | I10 (Primary hypertension): I10.1, I10.9<br>I15 (Secondary hypertension): I15.0, I15.1, I15.2, I15.8, I15.9                                                                                                                                                                                                                                                                                                                                                                                                                                                      |
| Diabetes                  | E10 (Type 1 diabetes mellitus): E10.0, E10.1, E10.2, E10.3, E10.4, E10.5, E10.6, E10.7, E10.8, E10.9<br>E11 (Type 2 diabetes mellitus): E11.0, E11.1, E11.2, E11.3, E11.4, E11.5, E11.6, E11.7, E11.8, E11.9<br>E12 (Malnutrition-related diabetes mellitus): E12.0, E12.1, E12.2, E12.3, E12.4, E12.5, E12.6, E12.7, E12.8, E12.9<br>E13 (Other specified diabetes mellitus): E13.0, E13.1, E13.2, E13.3, E13.4, E13.5, E13.6, E13.7, E13.8, E13.9<br>E14 (Unspecified diabetes mellitus): E14.0, E14.1, E14.2, E14.3, E14.4, E14.5, E14.6, E14.7, E14.8, E14.9 |
| Chronic liver disease     | K70 (Alcoholic liver disease): K70.0, K70.1, K70.2, K70.3, K70.4, K70.9<br>K72 (Hepatic failure, NEC): K72.0, K72.1, K72.9<br>K73 (Chronic hepatitis): K73.0, K73.1, K73.2, K73.8, K73.9<br>K74 (Fibrosis and cirrhosis of liver): K74.0, K74.1, K74.2, K74.3, K74.4, K74.5, K74.6<br>B18 (Chronic viral hepatitis): B18.0, B18.1, B18.2, B18.8, B18.9                                                                                                                                                                                                           |
| Chronic kidney disease    | N18 (Chronic kidney disease): N18.1, N18.2, N18.3, N18.4, N18.5, N18.9<br>N03 (Chronic nephritic syndrome): N03.0, N03.1, N03.2, N03.3, N03.4, N03.5, N03.6, N03.7, N03.8, N03.9<br>N05 (Unspecified nephritic syndrome): N05.0, N05.1, N05.2, N05.3, N05.4, N05.5, N05.6, N05.7, N05.8, N05.9                                                                                                                                                                                                                                                                   |
| Cardiovascular disease    | I20 (Angina pectoris): I20.0, I20.1, I20.8, I20.9<br>I21 (Acute myocardial infarction): I21.0, I21.1, I21.2, I21.3, I21.4, I21.9<br>I22 (Subsequent myocardial infarction): I22.0, I22.1, I22.8, I22.9<br>I24 (Other acute ischemic heart disease): I24.0, I24.1, I24.8, I24.9<br>I25 (Chronic ischemic heart disease): I25.0, I25.1, I25.2, I25.3, I25.4, I25.5, I25.6, I25.8, I25.9<br>I50 (Heart failure): I50.0, I50.1, I50.9                                                                                                                                |
| Dyslipidemia              | E78 (Disorders of lipoprotein metabolism and other lipidemia): E78.0, E78.1, E78.2, E78.4, E78.5                                                                                                                                                                                                                                                                                                                                                                                                                                                                 |
| Parkinson's disease       | G20 (Parkinson's disease)                                                                                                                                                                                                                                                                                                                                                                                                                                                                                                                                        |
| Chronic pulmonary disease | J41 (Simple and mucopurulent chronic bronchitis): J41.0, J41.1, J41.8<br>J43 (Emphysema): J43.0, J43.1, J43.2, J43.8, J43.9<br>J44 (Other chronic obstructive pulmonary disease): J44.0, J44.1, J44.8, J44.9<br>J45 (Asthma): J45.0, J45.1, J45.8, J45.9<br>J47 (Bronchiectasis)                                                                                                                                                                                                                                                                                 |

|                             |                                                                                                                                                                                                                                                                 |
|-----------------------------|-----------------------------------------------------------------------------------------------------------------------------------------------------------------------------------------------------------------------------------------------------------------|
| Myopia                      | H52.1 (Myopia)                                                                                                                                                                                                                                                  |
| Vitreous floaters           | H43.38 (Other vitreous opacities)                                                                                                                                                                                                                               |
| Thyroid disease             | E00 (Congenital iodine-deficiency syndrome): E00.0, E00.1, E00.2, E00.9<br>E03 (Other hypothyroidism): E03.0, E03.1, E03.2, E03.3, E03.4, E03.5, E03.8, E03.9<br>E05 (Thyrotoxicosis [hyperthyroidism]): E05.0, E05.1, E05.2, E05.3, E05.4, E05.5, E05.8, E05.9 |
| <b>Medications</b>          | <b>Billing Code</b>                                                                                                                                                                                                                                             |
| GnRH agonists or antagonist | Degarelix: 624401BIJ, 624402BIJ<br>Goserelin acetate: 167202BIJ, 167201BIJ<br>Leuprorelin acetate: 182602BIJ, 182604BIJ, 182605BIJ, 182606BIJ, 182608BIJ, 182610BIJ, 182611BIJ<br>Triptorelin acetate: 244902BIJ, 467501BIJ, 467502BIJ                          |
| Anti-androgens              | Bicalutamide: 117201ATB, 117202ATB<br>Cyproterone acetate: 139401ATB<br>Flutamide: 162101ATB                                                                                                                                                                    |

GnRH = gonadotropin-releasing hormone; ICD-10 = International Classification of Diseases, 10th revision; NEC = not else classified.

**Supplementary Table S2.** Relationship between ADT and newly developed neovascular AMD (1:1 matching ratio)

|                                   | <b>Cases (n = 1738)</b><br>n (%) | <b>Controls (n = 1738)</b><br>n (%) | <b>Crude OR</b><br><b>(95% CI)</b> | <b>P value</b> | <b>Adjusted OR</b><br><b>(95% CI)<sup>a</sup></b> | <b>P value</b> |
|-----------------------------------|----------------------------------|-------------------------------------|------------------------------------|----------------|---------------------------------------------------|----------------|
| <b>ADT administration</b>         |                                  |                                     |                                    |                |                                                   |                |
| Never                             | 1256 (72.27)                     | 1214 (69.85)                        | Reference                          |                | Reference                                         |                |
| Ever                              | 482 (27.73)                      | 524 (30.15)                         | 0.879 (0.753-1.025)                | 0.0997         | 0.885 (0.757-1.035)                               | 0.1249         |
| <b>Cumulative duration of ADT</b> |                                  |                                     |                                    |                |                                                   |                |
| None                              | 1256 (72.27)                     | 1214 (69.85)                        | Reference                          |                | Reference                                         |                |
| <1 year                           | 193 (11.10)                      | 257 (14.79)                         | 0.708 (0.573-0.875)                | 0.0014         | 0.713 (0.576-0.883)                               | 0.0019         |
| 1-2 years                         | 123 (7.08)                       | 110 (6.33)                          | 1.086 (0.820-1.439)                | 0.5648         | 1.072 (0.806-1.427)                               | 0.6311         |
| ≥2 years                          | 166 (9.55)                       | 157 (9.03)                          | 1.033 (0.807-1.321)                | 0.7983         | 1.057 (0.823-1.357)                               | 0.6635         |

ADT = androgen deprivation therapy; AMD = age-related macular degeneration; OR = odds ratio; CI = confidence interval.

<sup>a</sup>adjusted for cataracts, hypertension, diabetes mellitus, chronic liver disease, chronic kidney disease, cardiovascular disease, dyslipidemia, Parkinson's disease, chronic pulmonary disease, myopia, vitreous floaters, and thyroid disease.

**Supplementary Table S3.** Relationship between ADT and newly developed neovascular AMD (1:10 matching ratio)

|                                   | <b>Cases (n = 1639)</b><br>n (%) | <b>Controls (n = 16390)</b><br>n (%) | <b>Crude OR</b><br><b>(95% CI)</b> | <b>P value</b> | <b>Adjusted OR</b><br><b>(95% CI)<sup>a</sup></b> | <b>P value</b> |
|-----------------------------------|----------------------------------|--------------------------------------|------------------------------------|----------------|---------------------------------------------------|----------------|
| <b>ADT administration</b>         |                                  |                                      |                                    |                |                                                   |                |
| Never                             | 1182 (72.12)                     | 11342 (69.20)                        | Reference                          |                | Reference                                         |                |
| Ever                              | 457 (27.88)                      | 5048 (30.80)                         | 0.859 (0.763-0.966)                | 0.0109         | 0.873 (0.776-0.982)                               | 0.0242         |
| <b>Cumulative duration of ADT</b> |                                  |                                      |                                    |                |                                                   |                |
| None                              | 1182 (72.12)                     | 11342 (69.20)                        | Reference                          |                | Reference                                         |                |
| <1 year                           | 188 (11.47)                      | 2295 (14.00)                         | 0.770 (0.652-0.910)                | 0.0021         | 0.785 (0.664-0.928)                               | 0.0046         |
| 1-2 years                         | 116 (7.08)                       | 1224 (7.47)                          | 0.904 (0.734-1.112)                | 0.3382         | 0.909 (0.738-1.119)                               | 0.3698         |
| ≥2 years                          | 153 (9.33)                       | 1529 (9.33)                          | 0.960 (0.798-1.156)                | 0.6676         | 0.981 (0.814-1.182)                               | 0.838          |

ADT = androgen deprivation therapy; AMD = age-related macular degeneration; OR = odds ratio; CI = confidence interval.

<sup>a</sup>adjusted for cataracts, hypertension, diabetes mellitus, chronic liver disease, chronic kidney disease, cardiovascular disease, dyslipidemia, Parkinson's disease, chronic pulmonary disease, myopia, vitreous floaters, and thyroid disease.
